# Supplementary material for: Unavoidable food supply chain waste: acid-free pectin extraction from mango peel via subcritical water
Source: Royal Society of Chemistry journal article supplement (doi:10.1039/c7fd00035a), 2017-01-01
Supplement: c7fd00035a1.pdf [file c7fd00035a1.pdf]

## Supporting information

### Iodine solution test

The presence of starch was tested with the addition of amylase into pectin sample. 0.05 g of sample was weighed and added into 5 mL distilled water in a test tube with stirring for about 30 min until fully dissolved. Then about 1 mL of KI/I<sub>2</sub> solution was added into the test tube and the colour change was observed. The results are shown in table S1.

Table S1. KI/I<sub>2</sub> solution test for the presence of starch in mango peel pectin

| Sample | Component                   | Colour change after<br>KI/I <sub>2</sub> added |
|--------|-----------------------------|------------------------------------------------|
| 1      | Commercial starch           | Dark blue                                      |
| 2      | Mango peel pectin           | Dark blue                                      |
| 3      | Mango peel pectin + amylase | No change                                      |
| 4      | Commercial pectin           | No change                                      |
